# Supplementary material for: Tapping into the natural aromatic potential of microbial lignin valorization towards aromatic fine chemicals
Source: Royal Society of Chemistry journal article supplement (doi:10.1039/d4gc03567d), 2024-01-01
Supplement: d4gc03567d1.pdf [file d4gc03567d1.pdf]

**Electronic supplemental information**

**Tapping into the Natural Aromatic Potential:  
Microbial Lignin Valorization towards Aromatic  
Fine Chemicals**

Xiao-Lei Zhang <sup>a, b</sup>, Zhi-Hua Liu <sup>a, b, \*</sup>, Bing-Zhi Li <sup>a, b, \*</sup>, Ying-Jin Yuan <sup>a, b</sup>

<sup>a</sup> Frontiers Science Center for Synthetic Biology and Key Laboratory of Systems Bioengineering (Ministry of Education), School of Chemical Engineering and Technology, Tianjin University, Tianjin 300072, China

<sup>b</sup> Frontiers Research Institute for Synthetic Biology, Tianjin University, China

\* Corresponding authors: Zhi-Hua Liu, zhliu@tju.edu.cn; Bing-Zhi Li, bzli@tju.edu.cn

Table S1 The information of representative genes discussed in this review

| Genes          | Corresponding enzyme                                                   | Accession Number | Gene origin                                                                              |
|----------------|------------------------------------------------------------------------|------------------|------------------------------------------------------------------------------------------|
| <i>4CL</i>     | Hydroxycinnamic acid CoA ligase                                        | KF765780.1       | <i>Petroselinum crispum</i>                                                              |
| <i>VpVAN</i>   | Vanillin synthase                                                      | AKG47593.1       | <i>V. planifolia</i>                                                                     |
| <i>PahapaB</i> | 4-Hydroxyphenylacetate 3-monooxygenase                                 | PKG21040.1       | <i>P. aeruginosa</i>                                                                     |
| <i>EnhapaB</i> | 4-Hydroxyphenylacetate 3-monooxygenase                                 | PJG38870.1       | <i>Enterobacter cloacae</i>                                                              |
| <i>SehpaC</i>  | 4-Hydroxyphenylacetate 3-monooxygenase reductase                       | GAR62209.1       | <i>Salmonella enterica</i>                                                               |
| <i>AtCOMT</i>  | 3'-O-methyltransferase                                                 | NM_124796.4      | <i>Arabidopsis thaliana</i>                                                              |
| <i>HsCOMT</i>  | 3'-O-methyltransferase                                                 | NP_000745.1      | <i>Homo sapiens</i>                                                                      |
| <i>NtCOMT</i>  | 3'-O-methyltransferase                                                 | NP_001312531     | <i>Nicotiana tabacum</i>                                                                 |
| <i>PsVAO</i>   | Vanillyl alcohol oxidase                                               | CAA75722.1       | <i>Penicillium simplicissimum</i>                                                        |
| <i>Ssfcs</i>   | 4-Coumarate-CoA ligase                                                 | KC847405.1       | <i>Streptomyces sp. V-1</i>                                                              |
| <i>Ssech</i>   | Enoyl-CoA hydratase/aldolase                                           | KC847406.1       | <i>Streptomyces sp. V-1</i>                                                              |
| <i>Ppech</i>   | Enoyl-CoA hydratase/aldolase                                           | AAN68962.1       | <i>P. putida</i> KT2440                                                                  |
| <i>Ppfcs</i>   | 4-Coumarate-CoA ligase                                                 | AAN68960.2       | <i>P. putida</i> KT2440                                                                  |
| <i>vdh</i>     | Vanillin dehydrogenase                                                 | AAN68961.1       | <i>P. putida</i> KT2440                                                                  |
| <i>PobA</i>    | <i>p</i> -Hydroxybenzoate hydroxylase                                  | AAN69138.1       | <i>P. putida</i> KT2440                                                                  |
| <i>PdvanA</i>  | Vanillic acid <i>O</i> -demethylase oxygenase subunit A                | AAN69332.1       | <i>P. putida</i> KT2440                                                                  |
| <i>PdvanB</i>  | Vanillic acid <i>O</i> -demethylase oxygenase subunit B                | AAN69333.1       | <i>P. putida</i> KT2440                                                                  |
| <i>RjvanA</i>  | Vanillic acid <i>O</i> -demethylase oxygenase subunit A                | ABG95958.1       | <i>R. jostii</i> RHA1                                                                    |
| <i>RjvanB</i>  | Vanillic acid <i>O</i> -demethylase oxygenase subunit B                | ABG95956.1       | <i>R. jostii</i> RHA1                                                                    |
| <i>ligM</i>    | Vanillic acid <i>O</i> -demethylase oxygenase.                         | BAD61059.1       | <i>Sphingobium paucimobilis</i><br><i>Klebsiella pneumoniae</i> subsp. <i>pneumoniae</i> |
| <i>aroY</i>    | Protocatechuate decarboxylase                                          | BAH20873         | <i>Rhizorhabdus dicambivorans</i>                                                        |
| <i>Rdmetf1</i> | 5,10-Methylenetetrahydrofolate reductase                               | ATE65736.1       | <i>Sphingobium</i> sp. SYK-6                                                             |
| <i>Ssmetf1</i> | 5,10-Methylenetetrahydrofolate reductase                               | BAK65950.1       | <i>Sphingobium</i> sp. SYK-6                                                             |
| <i>desA</i>    | Syringate <i>O</i> -demethylase                                        | BAK67175         | <i>Sphingobium</i> sp. SYK-6                                                             |
| <i>ligV</i>    | Vanillin dehydrogenase                                                 | BAK65381.1       | <i>Sphingobium</i> sp. SYK-6                                                             |
| <i>MET6</i>    | 5-Methyltetrahydropteroyltriglutamate-homocysteine S-methyltransferase | SGD: S000000893  | <i>Saccharomyces cerevisiae</i>                                                          |
| <i>MET13</i>   | Methylenetetrahydrofolate reductase                                    | SGD: S000003093  | <i>Saccharomyces cerevisiae</i>                                                          |

|             |                            |                    |                                 |
|-------------|----------------------------|--------------------|---------------------------------|
| <i>ADH6</i> | Alcohol dehydrogenase      | SGD:<br>S000004937 | <i>Saccharomyces cerevisiae</i> |
| <i>ADH7</i> | Alcohol dehydrogenase      | SGD:<br>S000000702 | <i>Saccharomyces cerevisiae</i> |
| <i>FDC1</i> | Ferulic acid decarboxylase | SGD:<br>S000002947 | <i>Saccharomyces cerevisiae</i> |

---

The above information is sourced from: <https://www.ncbi.nlm.nih.gov/>, <https://www.yeastgenome.org/>.
